# Supplementary material
Source: PubMed Central journal article supplement (PMC3030644)
Supplement: NIHMS262690-supplement-01.pdf [file NIHMS262690-supplement-01.pdf]

**SUPPLEMENTARY MATERIAL**

*N*-Acylethanolamines as Novel Alcohol Dehydrogenase 5 Substrates

Milena Ivkovic, Edward W. Lowe, Jr., and David J. Merkler\*

Department of Chemistry, University of South Florida,  
4202 E. Fowler Ave., CHE 205, Tampa, FL 33620-5250, USA

\*Corresponding Author: Fax: 813-974-3203, E-mail address: merkler@usf.edu

**Table S1.**  
**Longer Acyl Chain NAEs as ADH3 Substrates<sup>a</sup>**

| Substrate                          | 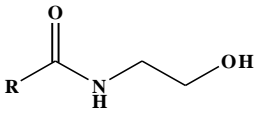                                                         | Relative Rates |
|------------------------------------|-------------------------------------------------------------------------------------------------------------------------------------------|----------------|
| <i>N</i> -Decanoylethanolamine     | R = CH <sub>3</sub> (CH <sub>2</sub> ) <sub>8</sub>                                                                                       | 1.0            |
| <i>N</i> -Lauroylethanolamine      | R = CH <sub>3</sub> (CH <sub>2</sub> ) <sub>10</sub>                                                                                      | 0.57           |
| <i>N</i> -Myristoylethanolamine    | R = CH <sub>3</sub> (CH <sub>2</sub> ) <sub>12</sub>                                                                                      | 0.061          |
| <i>N</i> -Oleoylethanolamine       | R = CH <sub>3</sub> (CH <sub>2</sub> ) <sub>7</sub> HC=CH(CH) <sub>7</sub>                                                                | 0.28           |
| <i>N</i> -Linoleoylethanolamine    | R = CH <sub>3</sub> (CH <sub>2</sub> ) <sub>7</sub> HC=CHCH <sub>2</sub> HC=CH(CH) <sub>4</sub>                                           | 0.26           |
| <i>N</i> -Arachidonoylethanolamine | R = CH <sub>3</sub> (CH <sub>2</sub> ) <sub>3</sub> HC=CHCH <sub>2</sub> HC=CHCH <sub>2</sub> HC=CHCH <sub>2</sub> HC=CH(CH) <sub>4</sub> | 0.24           |

<sup>a</sup>The substrate concentration was fixed at 55 μM for all NAE substrates included in Table S1. The initial rate obtained using 55 mM *N*-decanoylethanolamine was 0.091 units/mg.

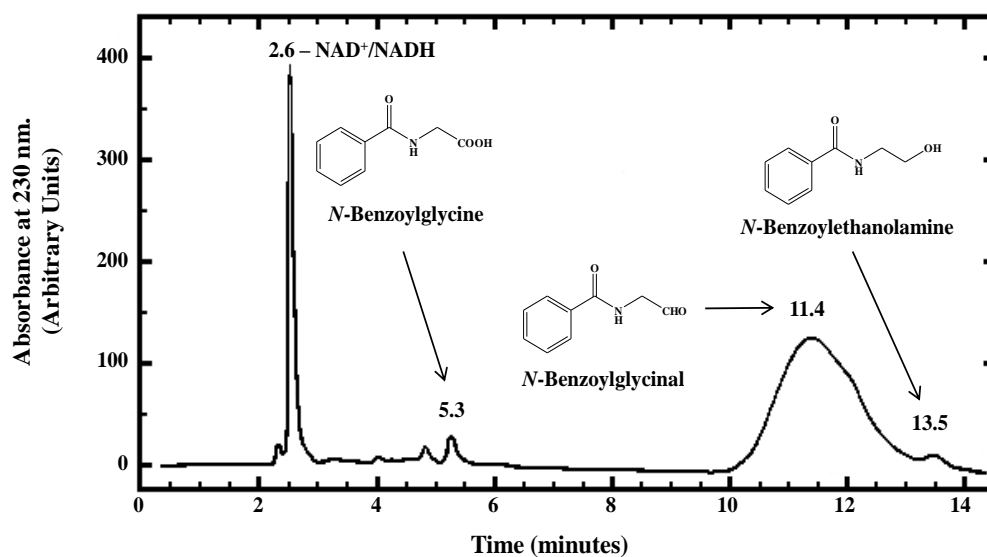

**Figure S1. HPLC Analysis of Non-enzymatic *N*-benzoylglycinal Dismutation.** *N*-Benzoylglycinal (4 mM) was incubated with 100 mM sodium pyrophosphate (pH 9.5) and 2.5 mM NAD<sup>+</sup> at 37 °C. The sample was analyzed after 30 min of incubation time.
